# Supplementary material for: MOF-based ionic sieve interphase for regulated Zn2+ flux toward dendrite-free aqueous zinc-ion batteries
Source: Royal Society of Chemistry journal article supplement (doi:10.1039/d1ta10245a), 2022-01-01
Supplement: d1ta10245a1.pdf [file d1ta10245a1.pdf]

## Supporting Information

### **MOF-based Ionic Sieve Interphase for Regulated Zn<sup>2+</sup> Flux Toward Dendrite-Free Aqueous Zinc Ion Battery**

*Yu Wang<sup>a</sup>, Yani Liu<sup>a</sup>, Haoqiang Wang<sup>a</sup>, Shuming Dou<sup>a</sup>, Wei Gan<sup>b</sup>, Lijie Ci<sup>a</sup>, Yan  
Huang<sup>a</sup>, Qunhui Yuan<sup>a,\*</sup>*

*<sup>a</sup>Shenzhen Key Laboratory of Flexible Printed Electronics Technology and R&D  
Center for Al-based Hydrogen Hydrolysis Materials, School of Materials Science and  
Engineering, Harbin Institute of Technology (Shenzhen), Shenzhen 518055, China*

*<sup>b</sup>Shenzhen Key Laboratory of Flexible Printed Electronics Technology and School of  
Materials Science, School of Science, Harbin Institute of Technology (Shenzhen),  
Shenzhen 518055, China*

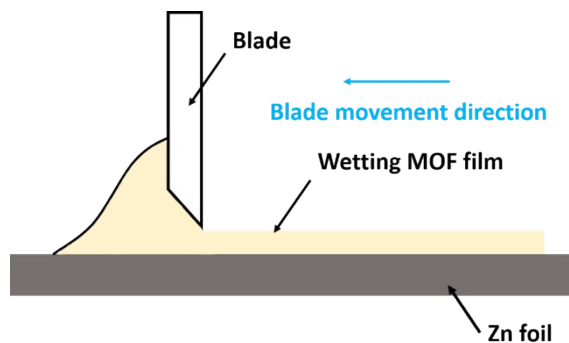

**Scheme S1.** Schematic diagram of the preparation of Zn-BTC coated Zn anode.

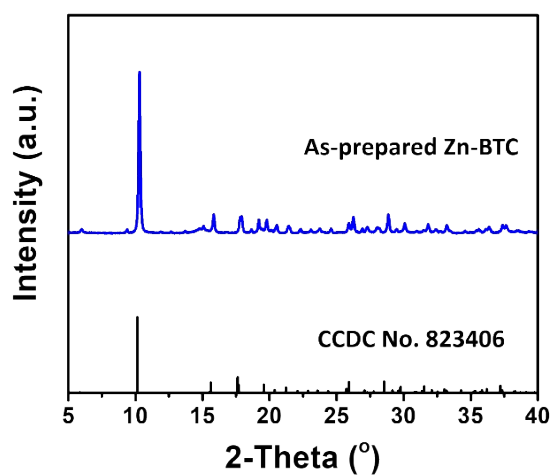

**Figure S1.** XRD patterns of the as-prepared Zn-BTC (upper curve) and standard sample (lower lines).

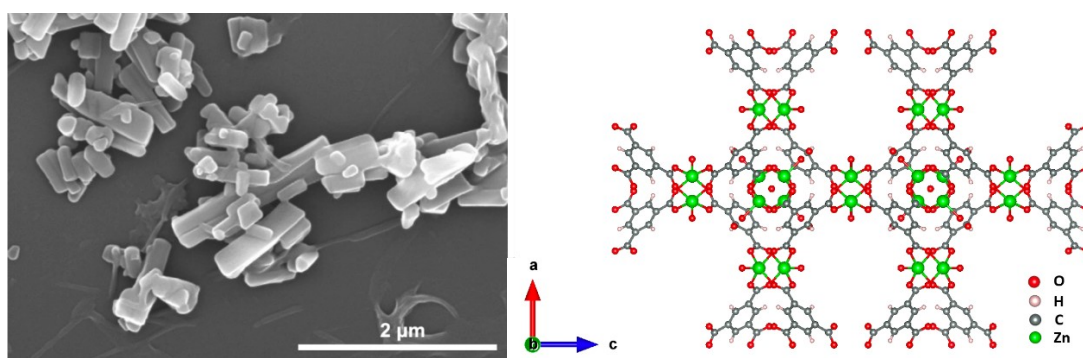

**Figure S2.** SEM image of as-prepared Zn-BTC (left), where each Zn(II) ion is connected with four carboxylate groups from four  $\text{BTC}^{3-}$  units to form the highly symmetrical 3D porous structure (right).

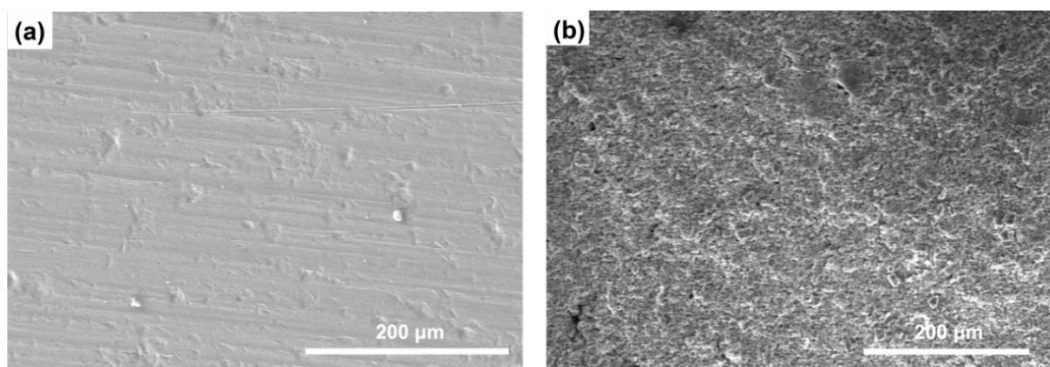

**Figure S3.** SEM images of (a) bare Zn and (b) coated Zn.

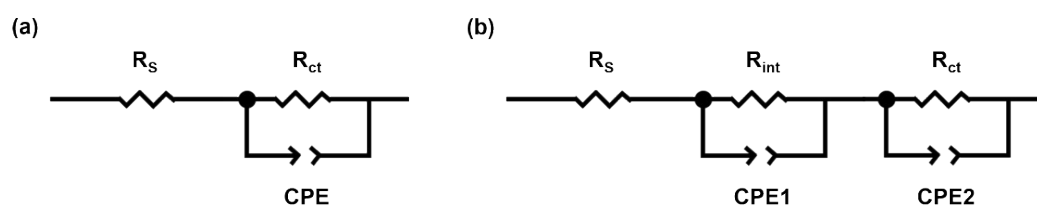

**Figure S4.** Equivalent circuit diagrams of symmetric cells with (a) bare Zn and (b) coated Zn.

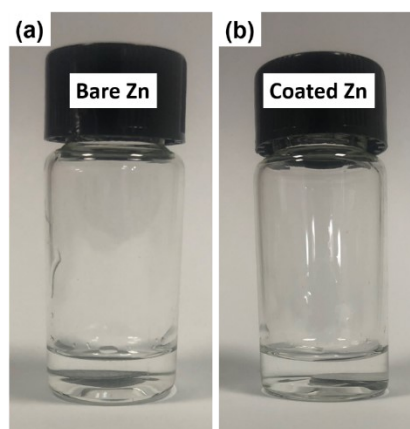

**Figure S5.** Photographs of (a) bare Zn and (b) coated Zn foil soaked in 2 M  $\text{ZnSO}_4$  electrolyte.

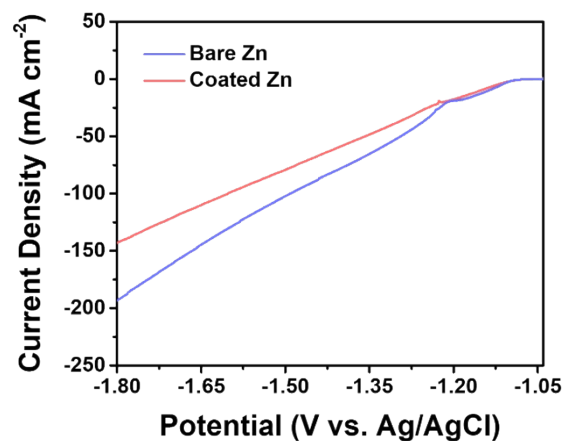

**Figure S6.** LSV curves presenting hydrogen evolution behaviors at bare and coated Zn in 2 M ZnSO<sub>4</sub>, respectively. Scan rate: 5 mV s<sup>-1</sup>.

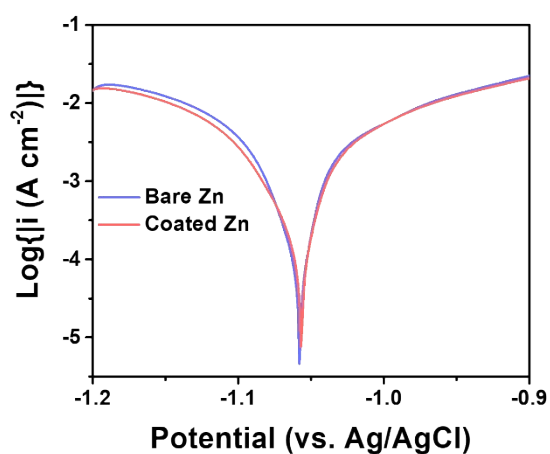

| Samples   | Corrosion potential (V) | Corrosion current density (mA cm <sup>-2</sup> ) |
|-----------|-------------------------|--------------------------------------------------|
| Bare Zn   | -1.058                  | 3.06                                             |
| Coated Zn | -1.057                  | 2.17                                             |

**Figure S7.** Linear polarization curves and corresponding corrosion potential and corrosion current density of coated Zn and bare Zn in 2 M ZnSO<sub>4</sub>. Scan rate: 2 mV s<sup>-1</sup>.

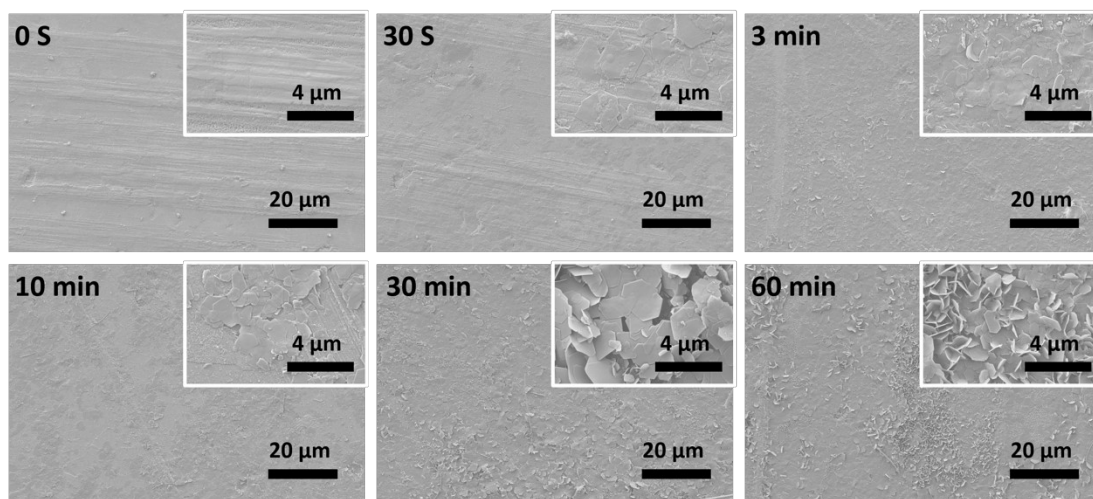

**Figure S8.** SEM images of morphology evolution on bare Zn. Plating current density:  $1 \text{ mA cm}^{-2}$ .

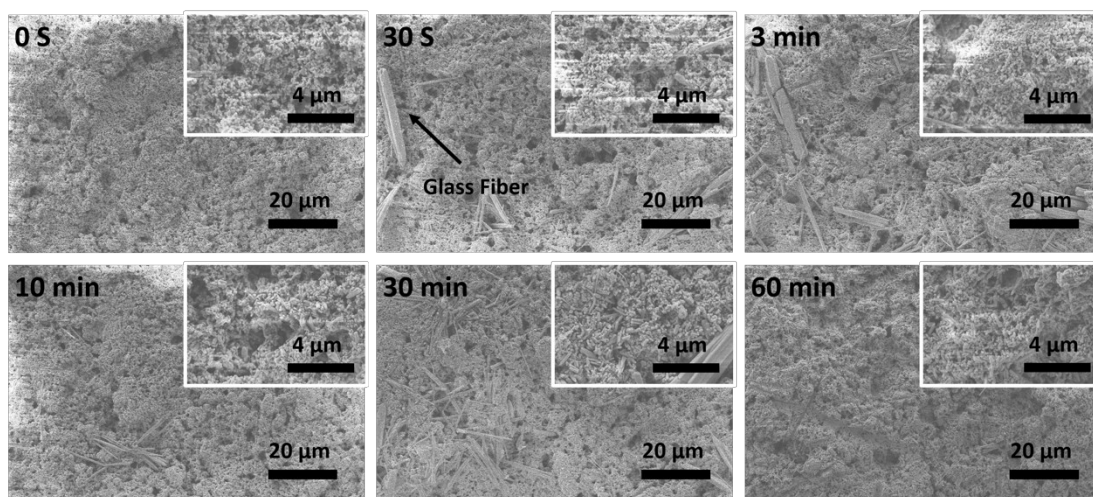

**Figure S9.** SEM images of morphology evolution on coated Zn. Plating current density:  $1 \text{ mA cm}^{-2}$ .

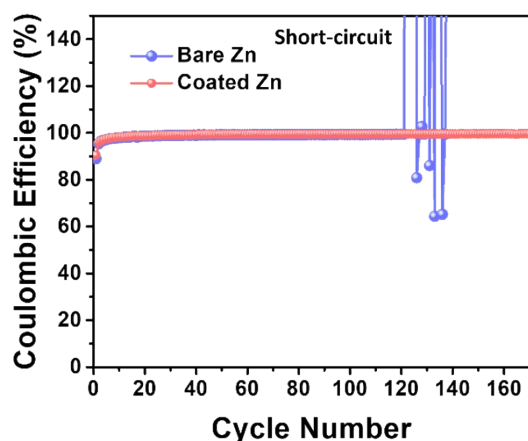

**Figure S10.** Coulombic efficiencies of the half cells with bare Zn/coated Zn anode at a current density of  $1 \text{ mA cm}^{-2}$  with a capacity of  $1 \text{ mA h cm}^{-2}$ .

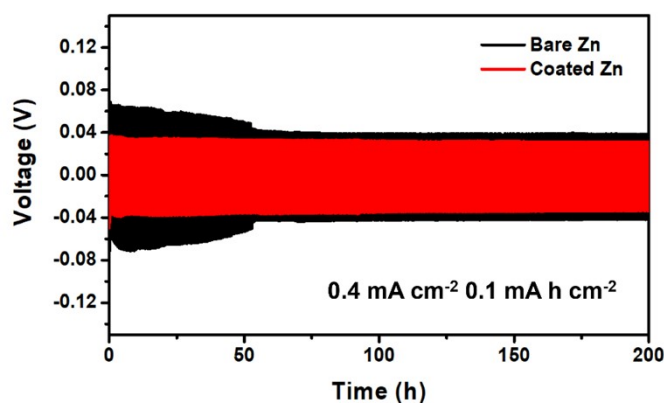

**Figure S11.** Galvanostatic cycling voltage profiles of symmetric cells with bare Zn and coated Zn at a current density of  $0.4 \text{ mA cm}^{-2}$  with a capacity of  $0.1 \text{ mA h cm}^{-2}$ .

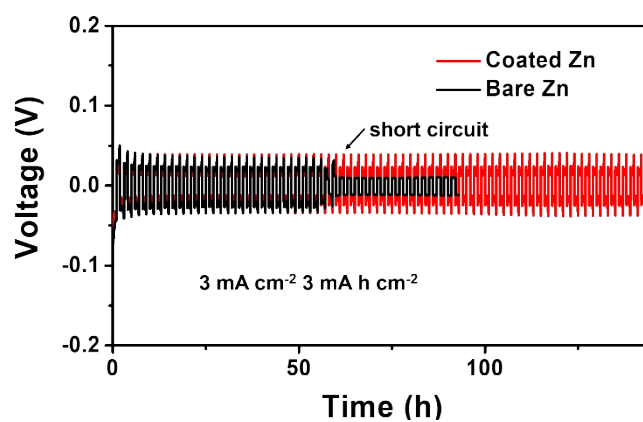

**Figure S12.** Galvanostatic cycling voltage profiles of symmetric cells with bare Zn and coated Zn at a current density of  $3 \text{ mA cm}^{-2}$  with a capacity of  $3 \text{ mA h cm}^{-2}$ .

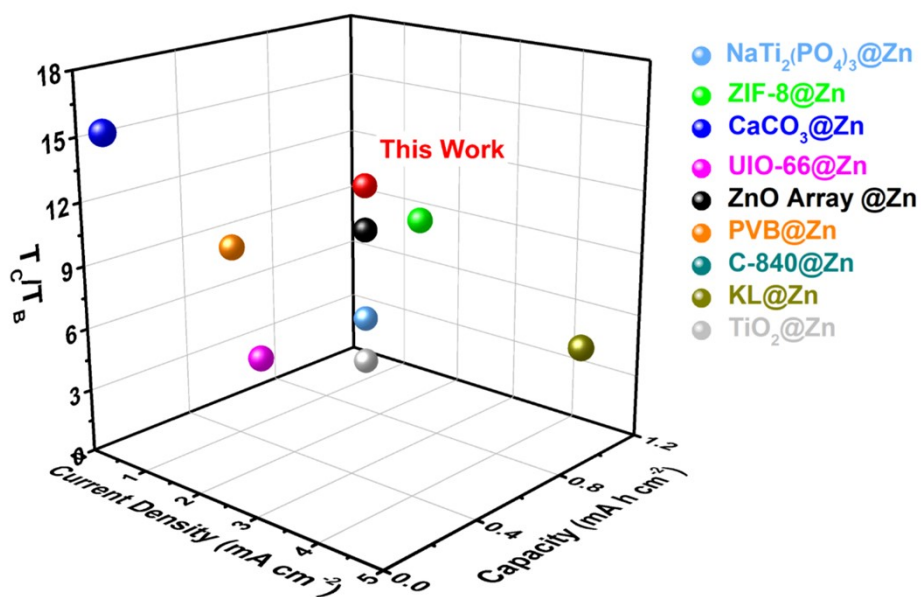

**Figure S13.** Comparison on the cycle performance of this work and some recently reported works<sup>S1-9</sup>.  $T_C/T_B$  is the battery life time ratio of ZIB based on protected Zn anode to that based on bare Zn anode.

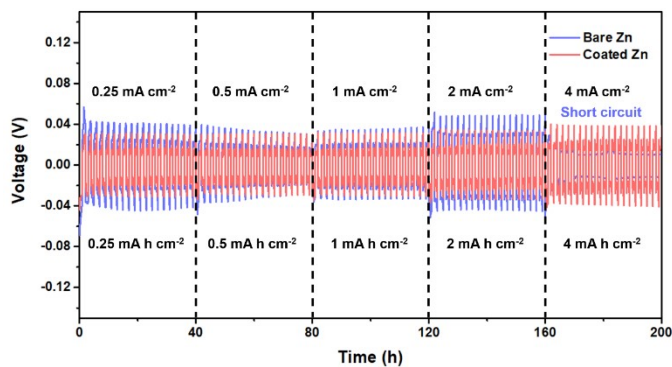

**Figure S14.** Rate performance of symmetric cells with bare Zn and coated Zn.

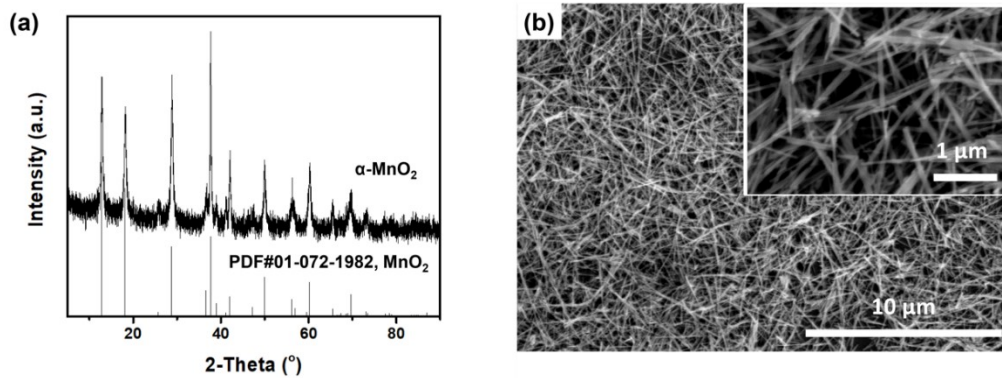

**Figure S15.** (a) XRD pattern of as-prepared  $\alpha$ -MnO<sub>2</sub>. (b) SEM images of as-prepared  $\alpha$ -MnO<sub>2</sub>.

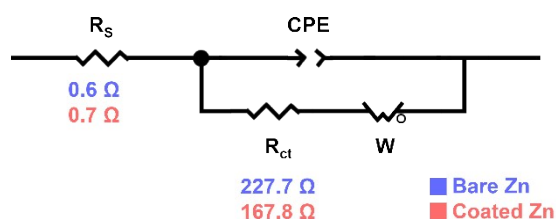

**Figure S16.** Equivalent circuit diagrams of full cells and the fitting resistance values.

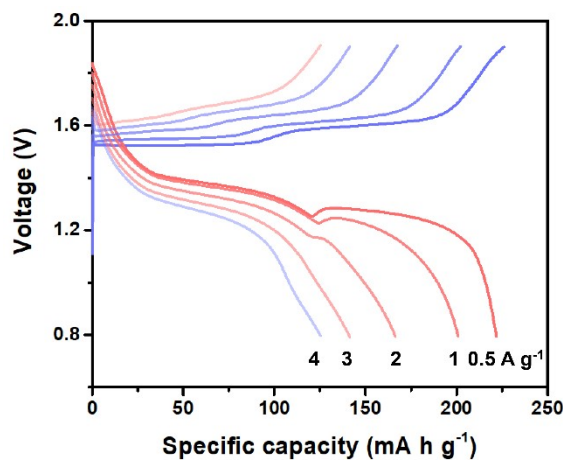

**Figure S17.** Charge-discharge curves of MnO<sub>2</sub>//bare Zn cell at different current densities.

**Table S1.** Resistance values deduced from the fitting of EIS curves in Figure 2a.

| Samples                                                             | $R_s$ | $R_{int}/\Omega$ | $R_{ct}/\Omega$ |
|---------------------------------------------------------------------|-------|------------------|-----------------|
| Bare Zn                                                             | 1.1   | -                | 253.1           |
| 10 $\mu\text{m}$ Zn <sub>3</sub> (BTC) <sub>2</sub> -PVDF coated Zn | 0.9   | 22.8             | 157.5           |
| 20 $\mu\text{m}$ Zn <sub>3</sub> (BTC) <sub>2</sub> -PVDF coated Zn | 0.8   | 10.6             | 109.2           |
| 30 $\mu\text{m}$ Zn <sub>3</sub> (BTC) <sub>2</sub> -PVDF coated Zn | 1.0   | 9.0              | 130.8           |



**Table S2. Comparison on the performance of ZIBs with present Zn<sub>3</sub>(BTC)<sub>2</sub>@Zn and other works.**

| Electrode                                             | Electrolyte                                    | Current density (mA cm <sup>-2</sup> ) | Capacity (mA h cm <sup>-2</sup> ) | Lifetime (h) T <sub>C</sub> | Bare Zn under the same conditions (h) T <sub>B</sub> | Ratio (T <sub>C</sub> /T <sub>B</sub> ) | Reference        | Method                            |
|-------------------------------------------------------|------------------------------------------------|----------------------------------------|-----------------------------------|-----------------------------|------------------------------------------------------|-----------------------------------------|------------------|-----------------------------------|
| NaTi <sub>2</sub> (PO <sub>4</sub> ) <sub>3</sub> @Zn | 2 M ZnSO <sub>4</sub>                          | 1                                      | 1                                 | 260                         | 80                                                   | 3.3                                     | S1               | Doctor Blade                      |
| ZIF-8@Zn                                              | 2 M ZnSO <sub>4</sub>                          | 2                                      | 1                                 | 1200                        | 130                                                  | 9.2                                     | S2               | Solvothermal                      |
| CaCO <sub>3</sub> @Zn                                 | 3 M ZnSO <sub>4</sub> +0.1 M MnSO <sub>4</sub> | 0.25                                   | 0.05                              | 836                         | 55                                                   | 15.2                                    | S3               | Doctor Blade                      |
| UIO-66@Zn                                             | 3 M ZnSO <sub>4</sub> +0.1 M MnSO <sub>4</sub> | 1                                      | 0.5                               | 500                         | 150                                                  | 3.3                                     | S4               | Doctor Blade                      |
| ZnO array @Zn                                         | 1 M Zn(OTf) <sub>2</sub>                       | 1                                      | 1                                 | 400                         | <50                                                  | >8                                      | S5               | Periodic Anodizing                |
| PVB@Zn                                                | 1 M ZnSO <sub>4</sub>                          | 0.5                                    | 0.5                               | 2200                        | 260                                                  | 8.5                                     | S6               | Spin Coating                      |
| C-840@Zn                                              | 2 M ZnSO <sub>4</sub>                          | 1                                      | 1                                 | 400                         | 400                                                  | 1                                       | S7               | Immersing Overnight and Pyrolysis |
| KL@Zn                                                 | 2 M ZnSO <sub>4</sub> +0.1 M MnSO <sub>4</sub> | 4.4                                    | 1.1                               | 800                         | 184.7                                                | 4.3                                     | S8               | Doctor Blade                      |
| TiO <sub>2</sub> @Zn                                  | 3 M Zn(OTf) <sub>2</sub>                       | 1                                      | 1                                 | 150                         | 150                                                  | 1                                       | S9               | Atomic Layer Deposition           |
| <b>Zn<sub>3</sub>(BTC)<sub>2</sub>@Zn</b>             | <b>2 M ZnSO<sub>4</sub></b>                    | <b>1</b>                               | <b>1</b>                          | <b>800</b>                  | <b>78</b>                                            | <b>10.3</b>                             | <b>This work</b> | <b>Doctor Blade</b>               |

## References

- S1. M. Liu, J. Cai, H. Ao, Z. Hou, Y. Zhu and Y. Qian, *Advanced Functional Materials*, 2020, **30**, 2004885.
- S2. X. Liu, F. Yang, W. Xu, Y. Zeng, J. He and X. Lu, *Advanced Science*, 2020, **7**, 2002173.
- S3. L. Kang, M. Cui, F. Jiang, Y. Gao, H. Luo, J. Liu, W. Liang and C. Zhi, *Advanced Energy Materials*, 2018, **8**, 1801090.
- S4. M. Liu, L. Yang, H. Liu, A. Amine, Q. Zhao, Y. Song, J. Yang, K. Wang and F. Pan, *ACS Applied Materials & Interfaces*, 2019, **11**, 32046-32051.
- S5. J. Y. Kim, G. Liu, G. Y. Shim, H. Kim and J. K. Lee, *Advanced Functional Materials*, 2020, **30**, 2004210.
- S6. J. Hao, X. Li, S. Zhang, F. Yang, X. Zeng, S. Zhang, G. Bo, C. Wang and Z. Guo, *Advanced Functional Materials*, 2020, **30**, 2001263.
- S7. R. Yuksel, O. Buyukcakir, W. K. Seong and R. S. Ruoff, *Advanced Energy Materials*, 2020, **10**, 1904215.
- S8. C. Deng, X. Xie, J. Han, Y. Tang, J. Gao, C. Liu, X. Shi, J. Zhou and S. Liang, *Advanced Functional Materials*, 2020, 2000599.
- S9. K. Zhao, C. Wang, Y. Yu, M. Yan, Q. Wei, P. He, Y. Dong, Z. Zhang, X. Wang and L. Mai, *Advanced Materials Interfaces*, 2018, **5**, 1800848.
